# Supplementary material for: Solid–ionic liquid interfaces: pore filling revisited
Source: Royal Society of Chemistry journal article supplement (doi:10.1039/c4cp02749c), 2014-01-01
Supplement: c4cp02749c1.pdf [file c4cp02749c1.pdf]

## Solid-Ionic Liquid-Interfaces: Pore Filling Revisited

M. T. Heinze\*, J. C. Zill, J. Matysik, W.D. Einicke, R. Gläser, A. Stark\*

### Supplementary Information

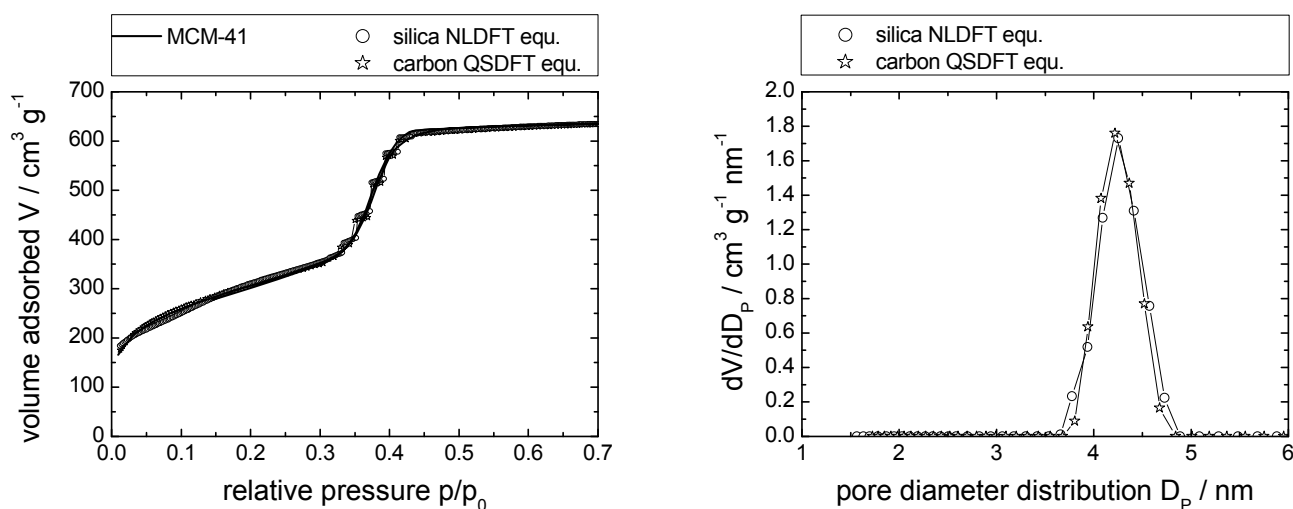

Figure SI 1a:  $N_2$ -sorption isotherm of the pristine MCM-41 (left; measured: squares; calculated using NLDFT and QSDFT: open circles and open stars, respectively), and resulting pore diameter distributions (right).

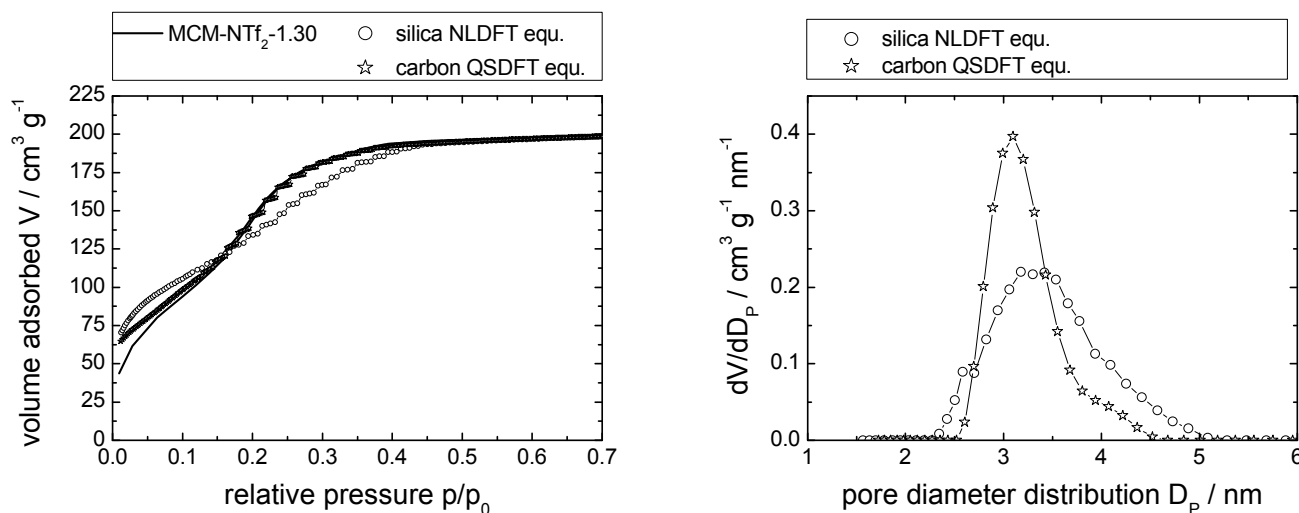

Figure SI 1b:  $N_2$ -sorption isotherm of MCM-NTf<sub>2</sub>-1.30 (left; measured: squares; calculated using NLDFT and QSDFT: open circles and open stars, respectively), and resulting pore diameter distributions (right).

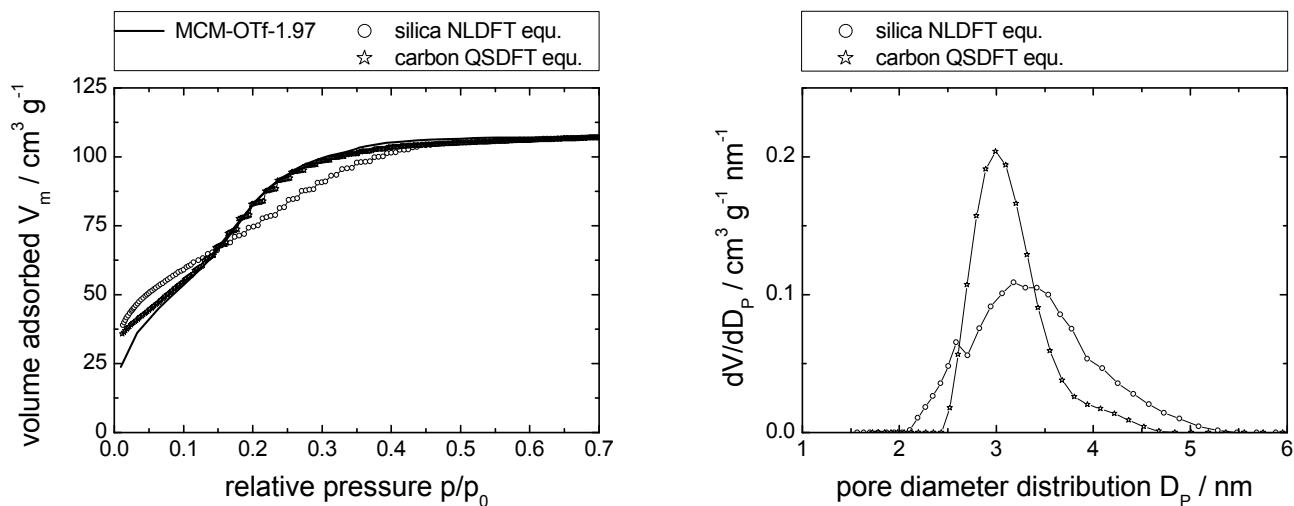

Figure SI 1c:  $N_2$ -sorption isotherm of MCM-OTf-1.97 (left; measured: squares; calculated using NLDFT and QSDFT: open circles and open stars, respectively), and resulting pore diameter distributions (right).

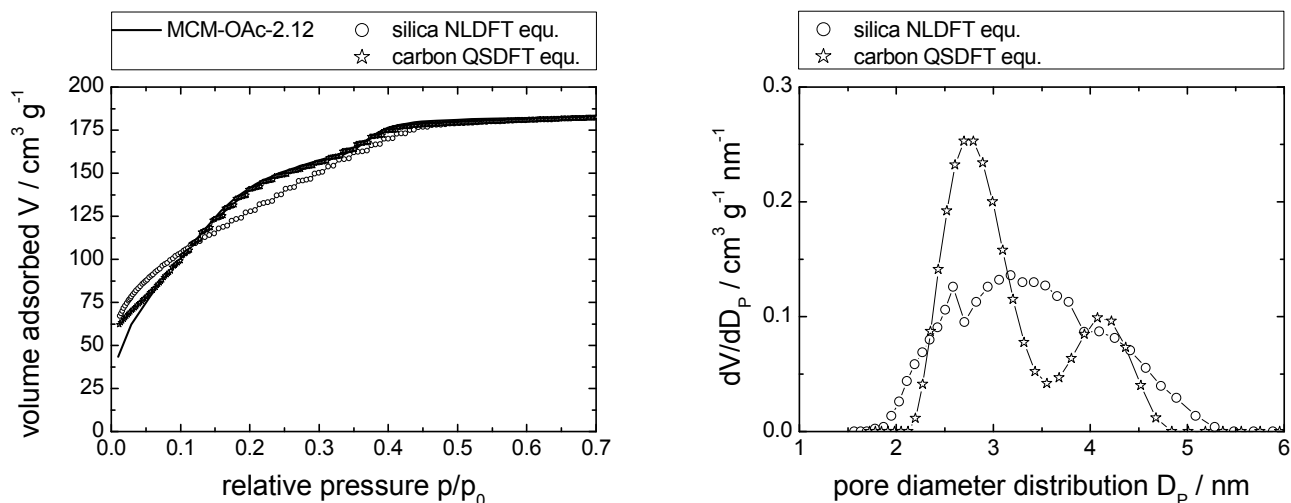

Figure SI 1d:  $N_2$ -sorption isotherm of MCM-OAc-2.12 (left; measured: squares; calculated using NLDFT and QSDFT: open circles and open stars, respectively), and resulting pore diameter distributions (right).

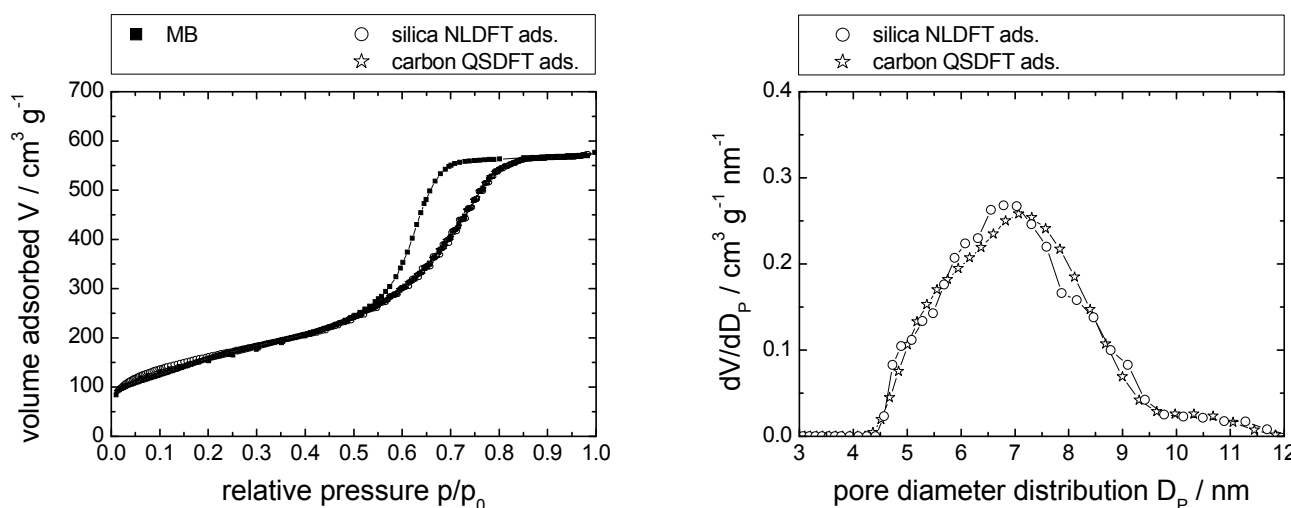

Figure SI 2a:  $N_2$ -sorption isotherm of pristine MB (left; measured: squares; calculated using NLDFT and QSDFT: open circles and open stars, respectively), and resulting pore diameter distributions (right).

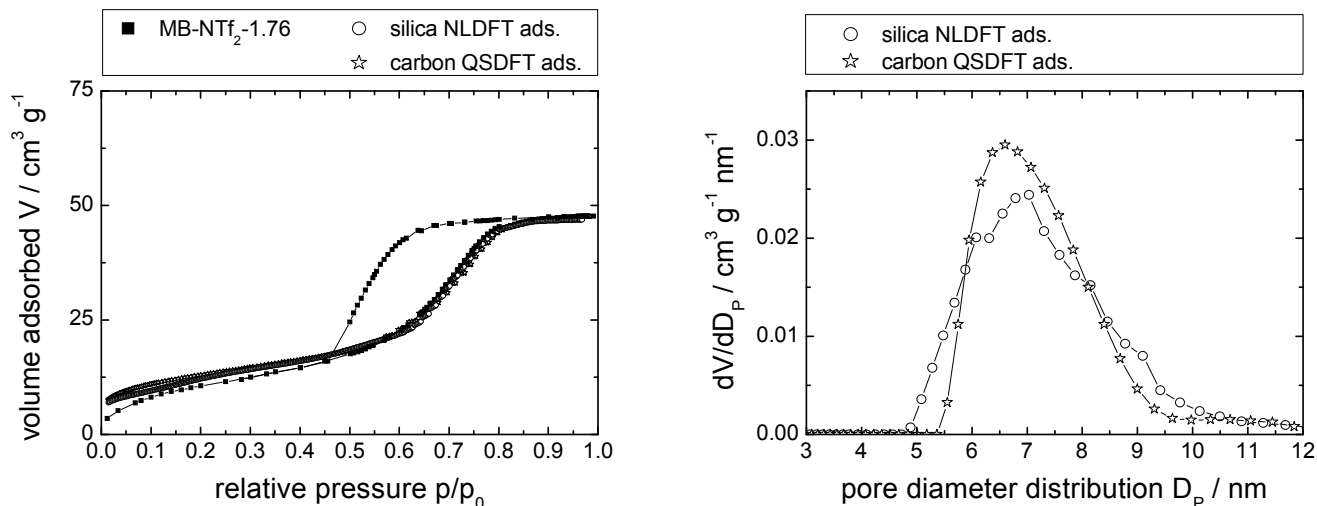

Figure SI 2b:  $N_2$ -sorption isotherm of MB-NTf<sub>2</sub>-1.76 (left; measured: squares; calculated using NLDFT and QSDFT: open circles and open stars, respectively), and resulting pore diameter distributions (right).

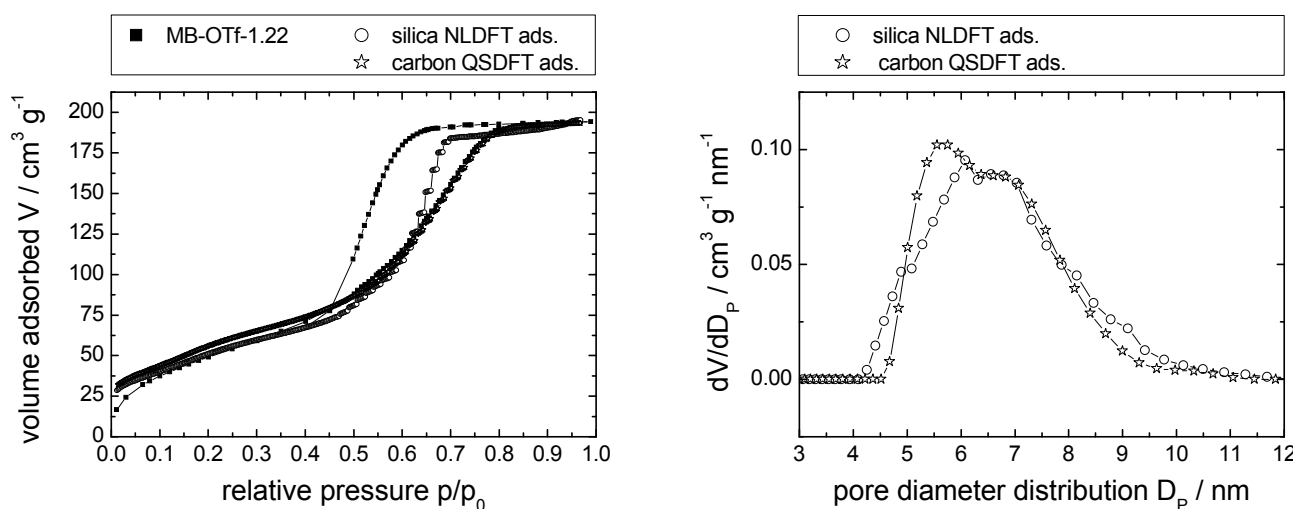

Figure SI 2c:  $N_2$ -sorption isotherm of MB-OTf-1.22 (left; measured: squares; calculated using NLDFT and QSDFT: open circles and open stars, respectively), and resulting pore diameter distributions (right).

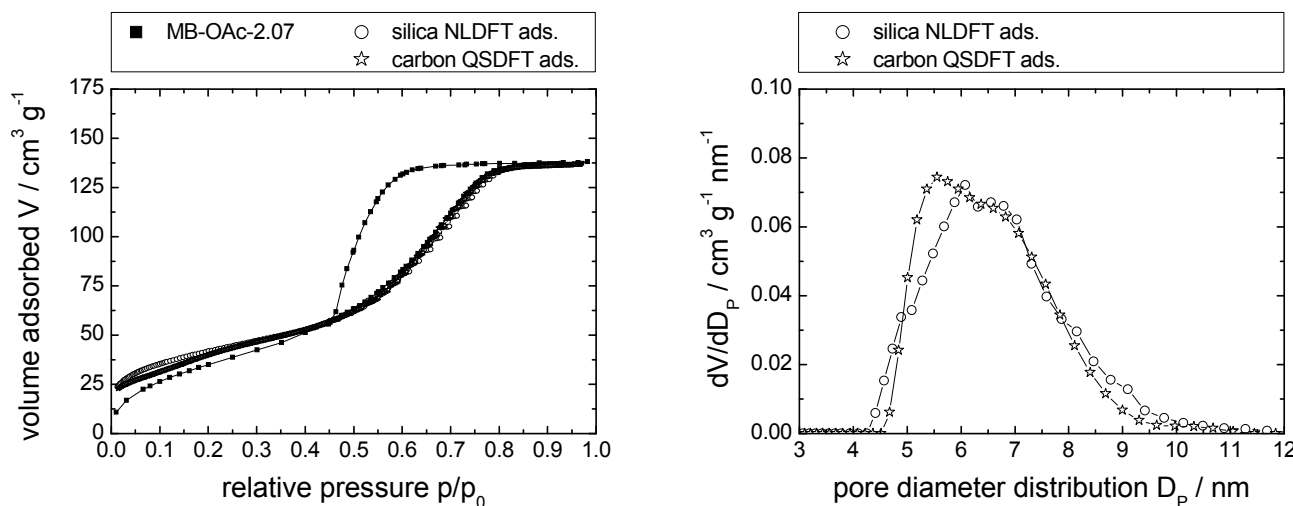

Figure SI 2d:  $N_2$ -sorption isotherm of MB-OAc-2.07 (left; measured: squares; calculated using NLDFT and QSDFT: open circles and open stars, respectively), and resulting pore diameter distributions (right).

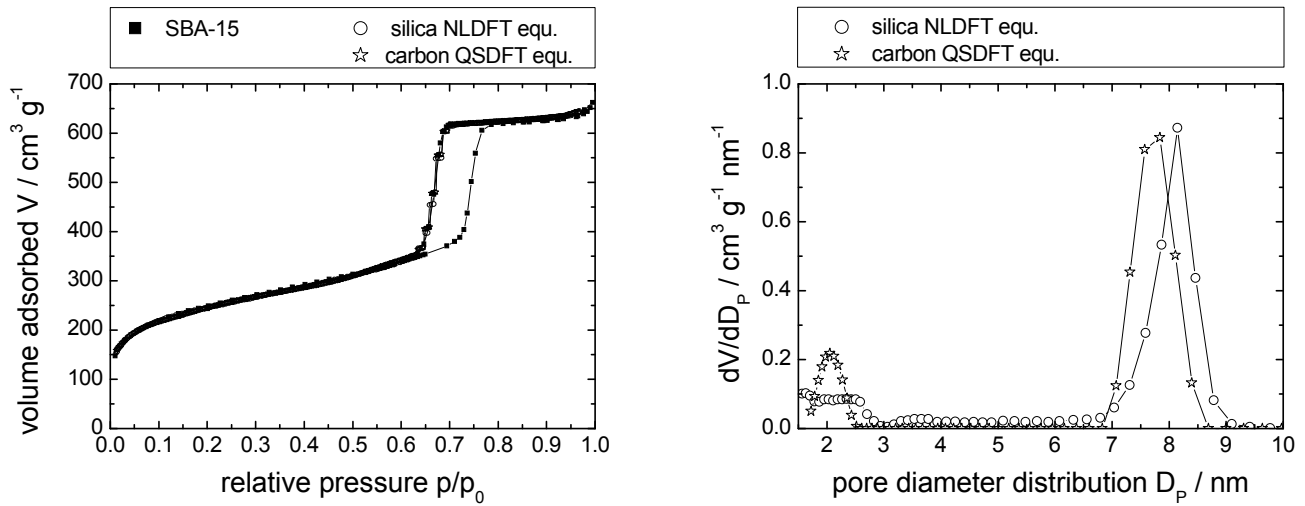

Figure SI 3a:  $N_2$ -sorption isotherm of pristine SBA-15 (left; measured: squares; calculated using NLDFT and QSDFT: open circles and open stars, respectively), and resulting pore diameter distributions (right).

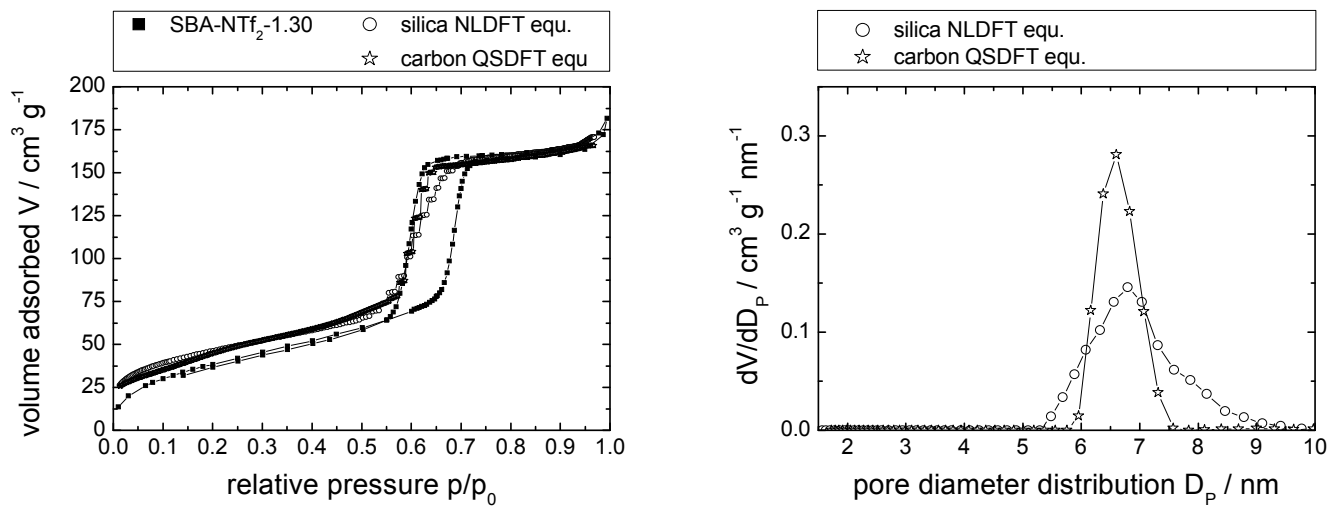

Figure SI 3b:  $N_2$ -sorption isotherm of SBA-NTf<sub>2</sub>-1.30 (left; measured: squares; calculated using NLDFT and QSDFT: open circles and open stars, respectively), and resulting pore diameter distributions (right).

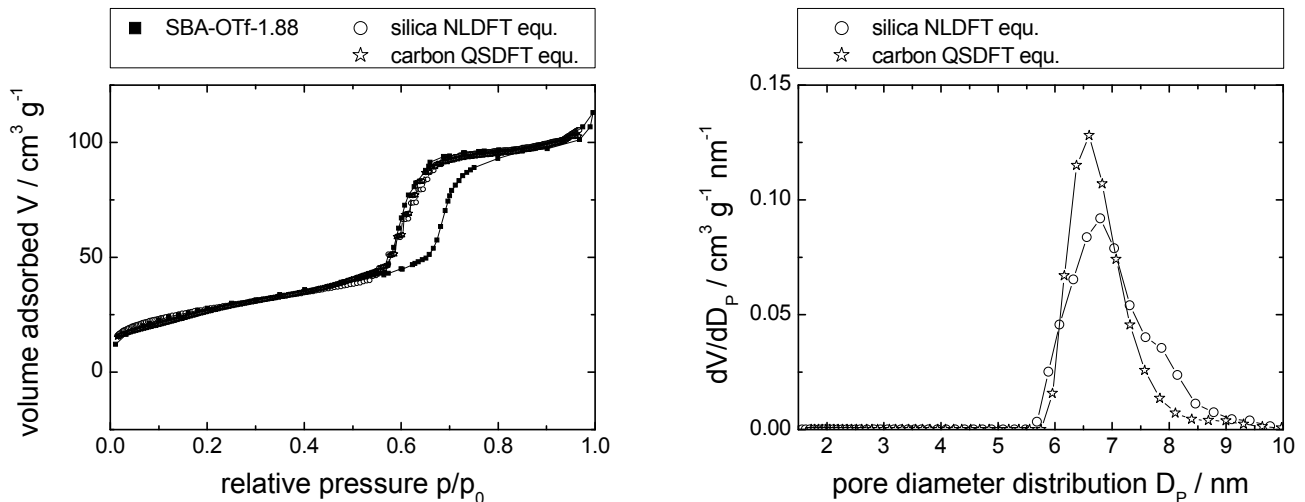

Figure SI 3c:  $N_2$ -sorption isotherm of SBA-OTf-1.88 (left; measured: squares; calculated using NLDFT and QSDFT: open circles and open stars, respectively), and resulting pore diameter distributions (right).

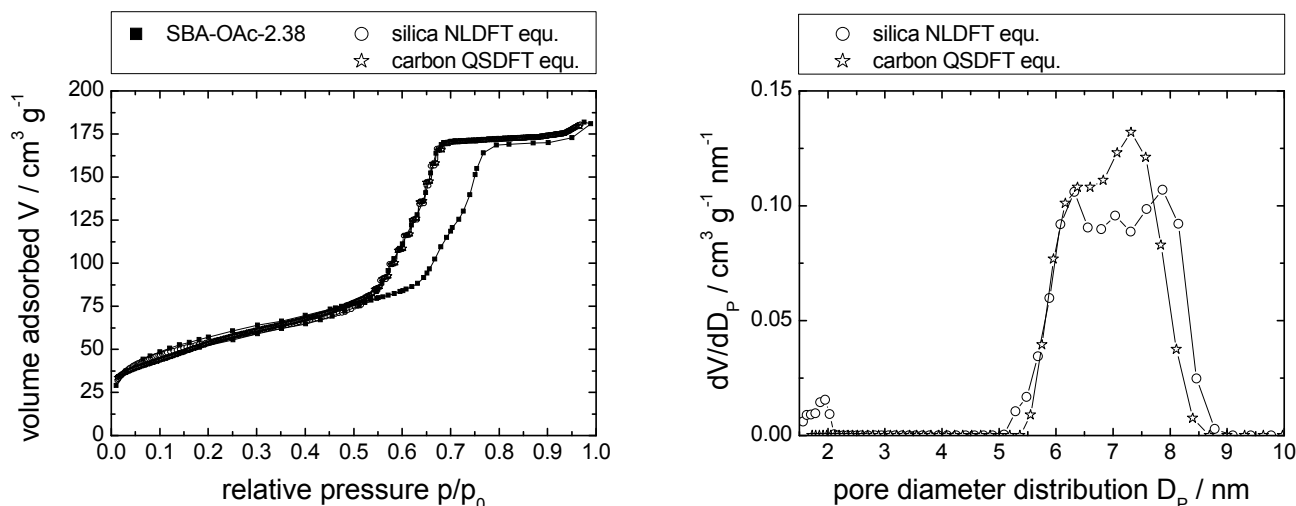

Figure SI 3d:  $N_2$ -sorption isotherm of SBA-OAc-2.38 (left; measured: squares; calculated using NLDFT and QSDFT: open circles and open stars, respectively), and resulting pore diameter distributions (right).

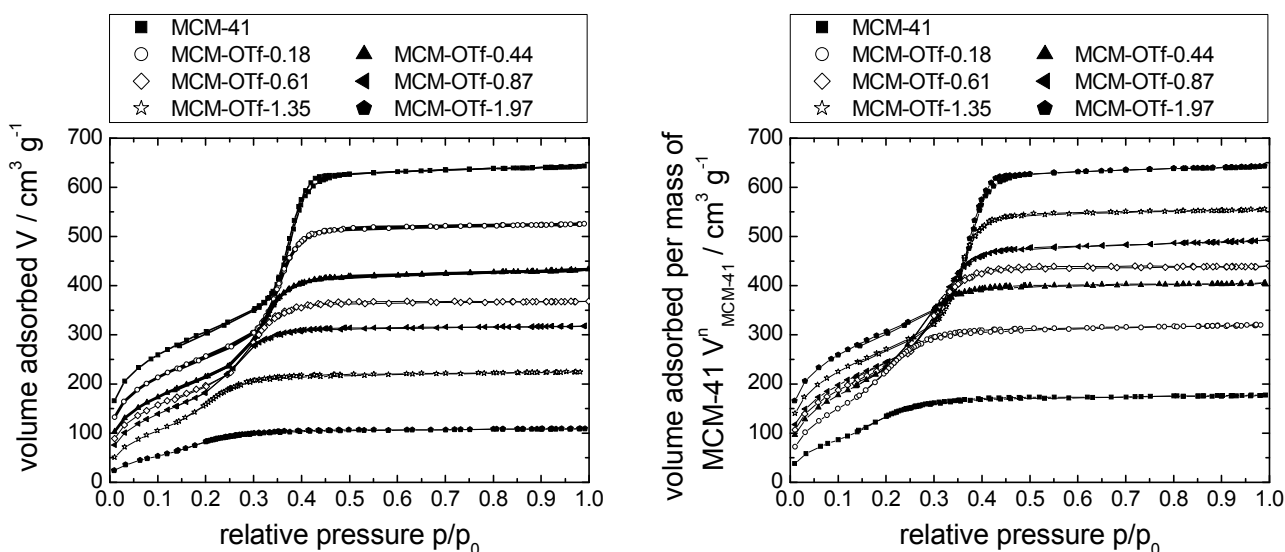

Figure SI 4:  $N_2$ -sorption isotherms at 77 K of MCM-41-based materials impregnated with incrementally increasing amounts of  $[C_6mim][OTf]$ , as volume adsorbed per mass of material (left) and as volume adsorbed per mass of support (right).

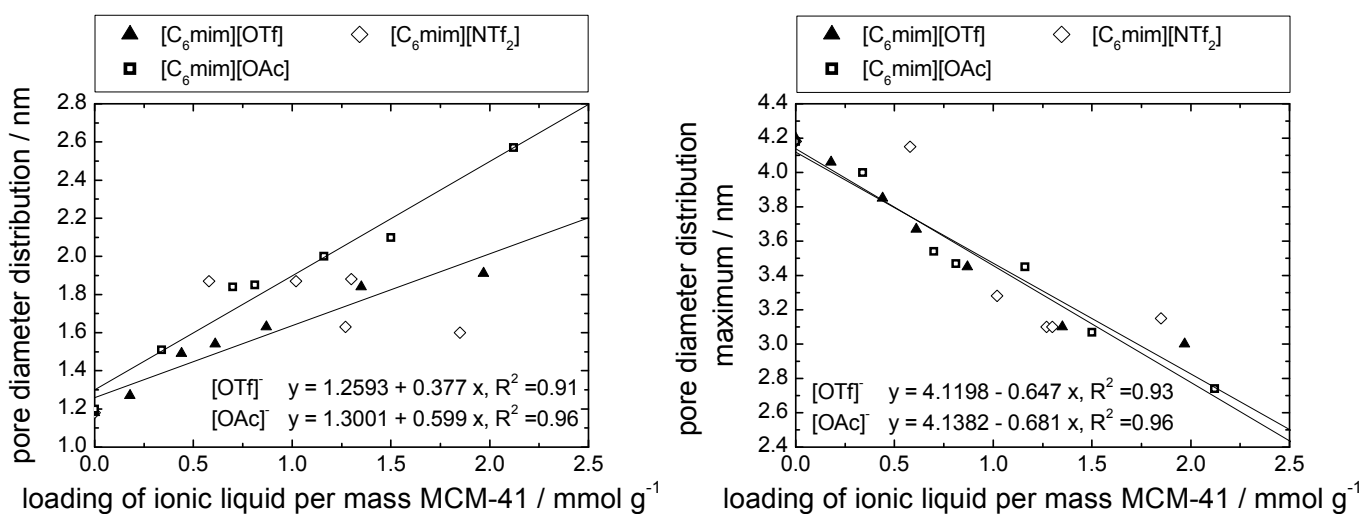

Figure SI 5: Pore diameter distribution vs. loading, and pore diameter distribution maximum vs. loading for all ionic liquids investigated on MCM-41.

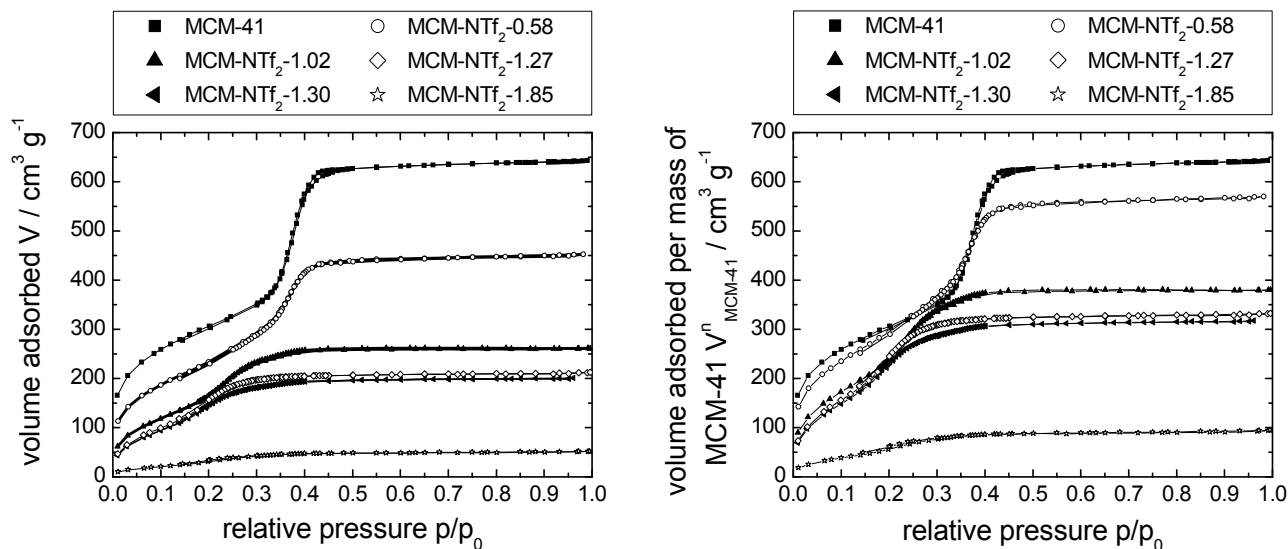

Figure SI 6:  $N_2$ -sorption isotherms at 77 K of MCM-41-based materials impregnated with incrementally increasing amounts of  $[C_6mim][NTf_2]$ , as volume absorbed per mass of material (left) and as volume absorbed per mass of support (right).

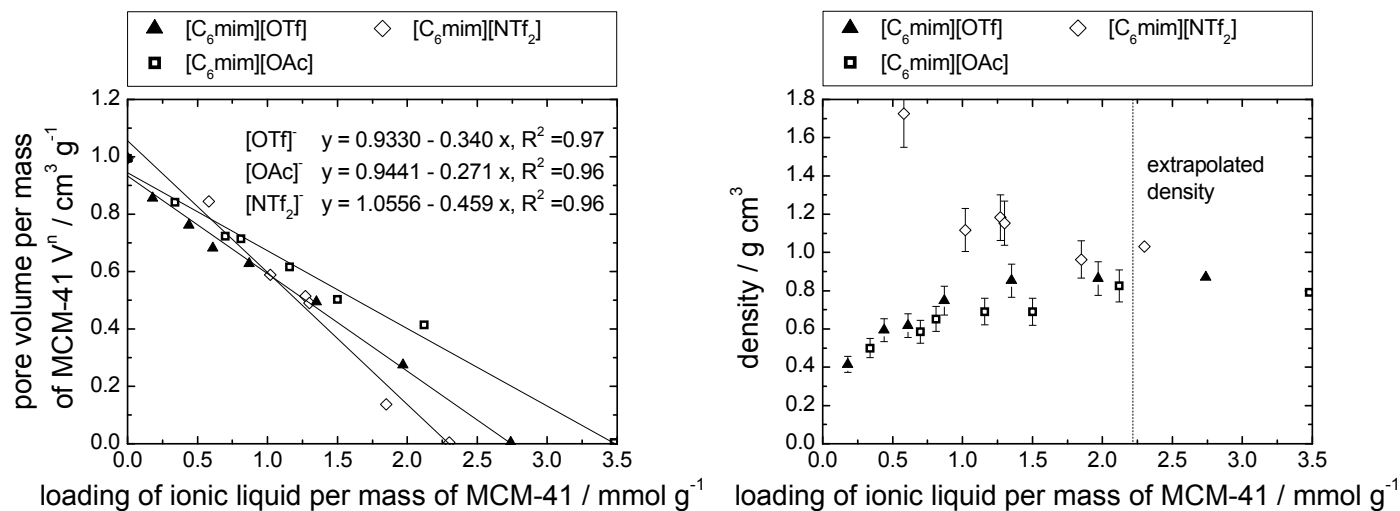

Figure SI 7: Pore volume vs. loading, and density vs. loading of MCM-41 modified with incrementally increasing amounts of the ionic liquids investigated. The theoretical loading for complete pore filling ( $V_n = 0$ ) is linearly extrapolated from the experimental data.

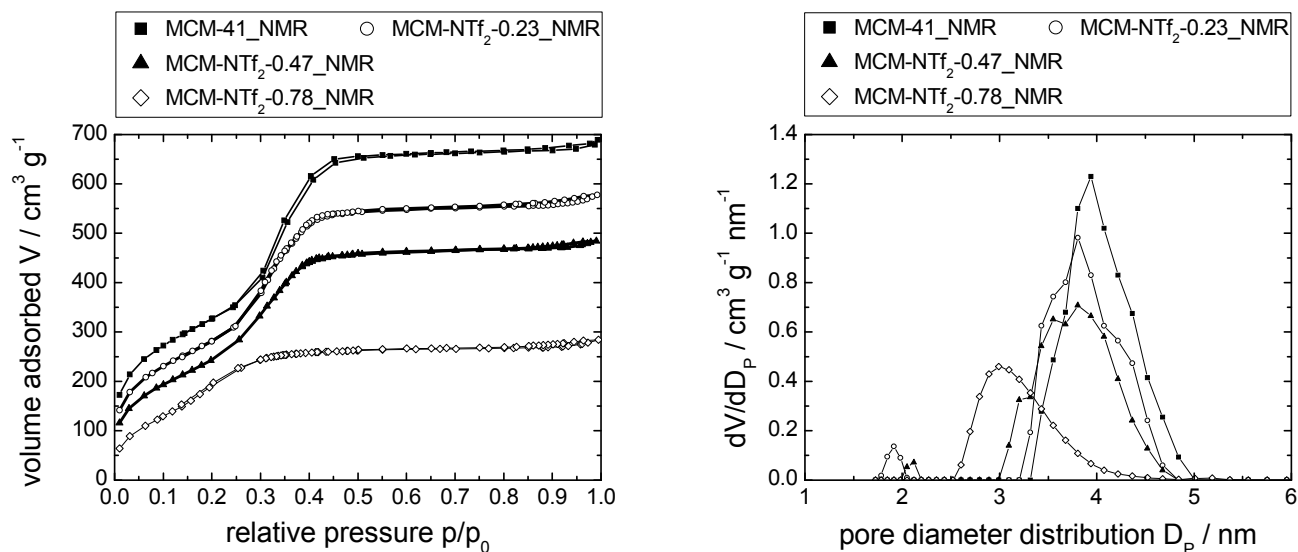

Figure SI 8:  $N_2$ -sorption isotherms at 77 K of MCM-41\_NMR, and of MCM-41\_NMR modified with  $[C_6mim][NTf_2]$  (left) and pore diameter distribution (right) of MCM-41\_NMR, and of MCM-41\_NMR modified with  $[C_6mim][NTf_2]$ .

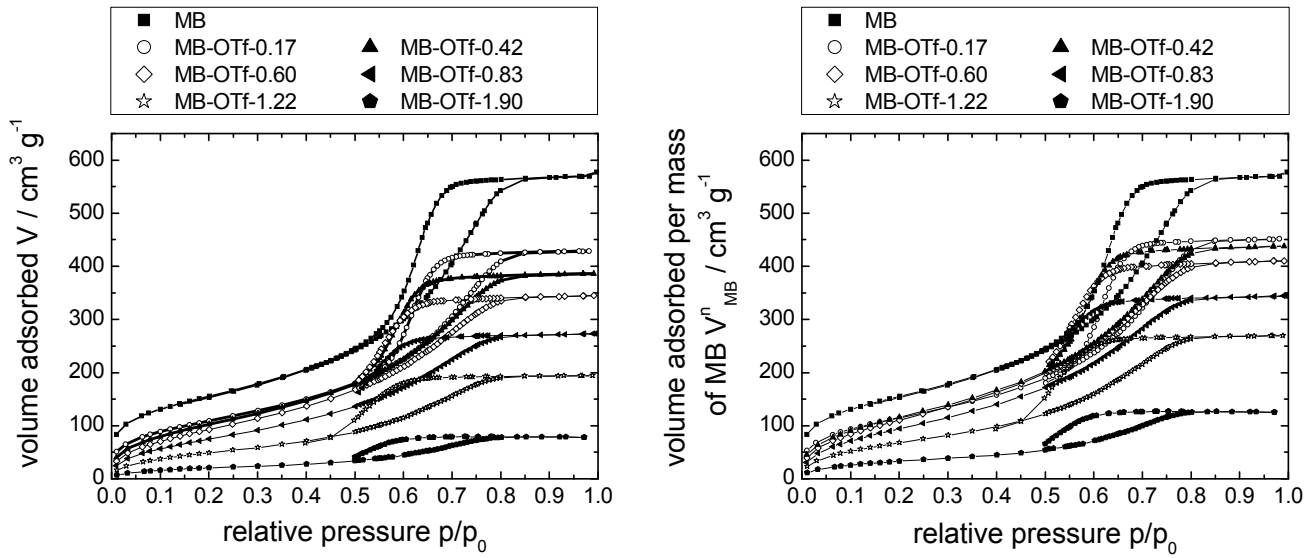

Figure SI 9:  $N_2$ -sorption isotherms at 77 K of MB-based materials impregnated with incrementally increasing amounts of  $[C_6mim][OTf]$ ; as volume absorbed per mass of material (left) and as volume absorbed per mass of support (right).

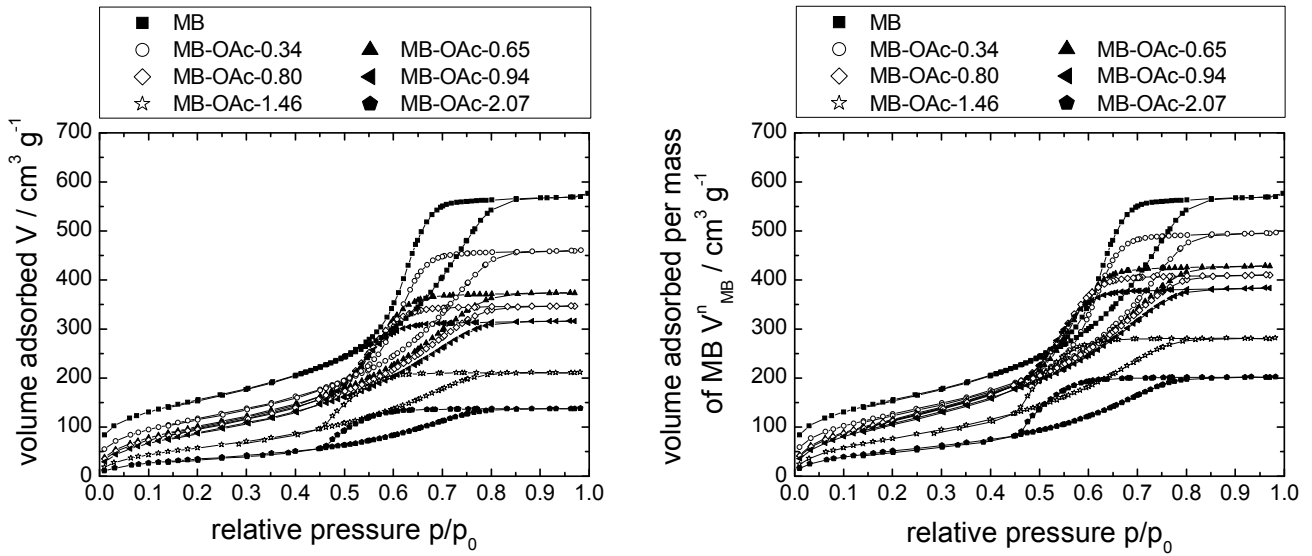

Figure SI 10:  $N_2$ -sorption isotherms at 77 K of MB-based materials impregnated with incrementally increasing amounts of  $[C_6mim][OAc]$ ; as volume absorbed per mass of material (left) and as volume absorbed per mass of support (right).

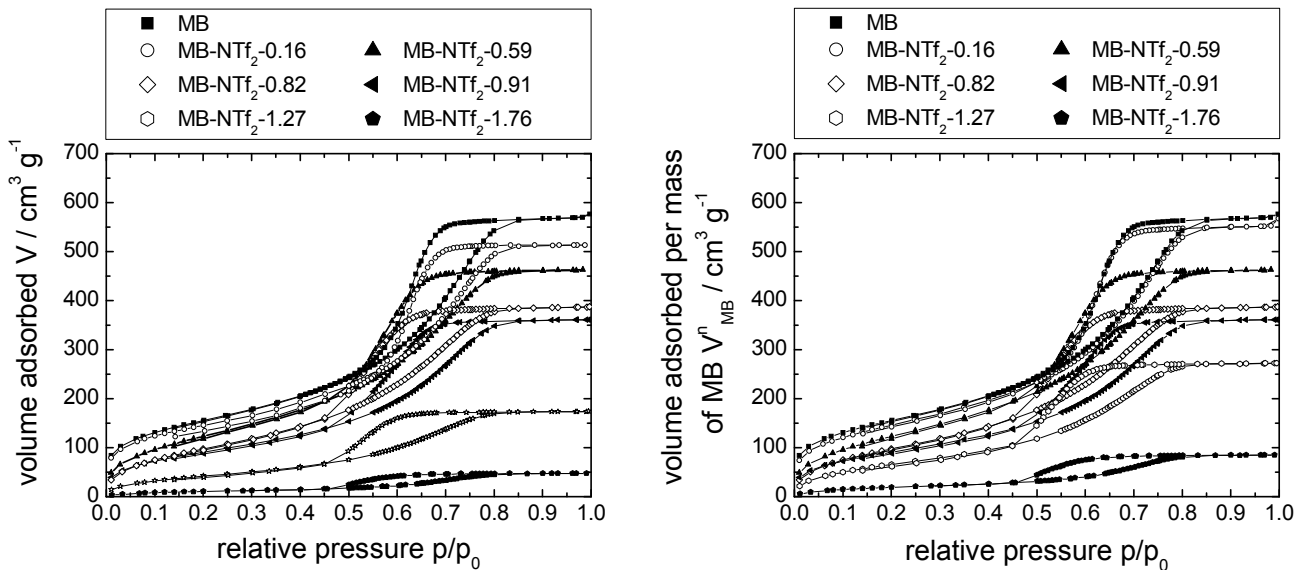

Figure SI 11:  $N_2$ -sorption isotherms at 77 K of MB-based materials impregnated with incrementally increasing amounts of  $[C_6mim][NTf_2]$ ; as volume absorbed per mass of material (left) and as volume absorbed per mass of support (right).

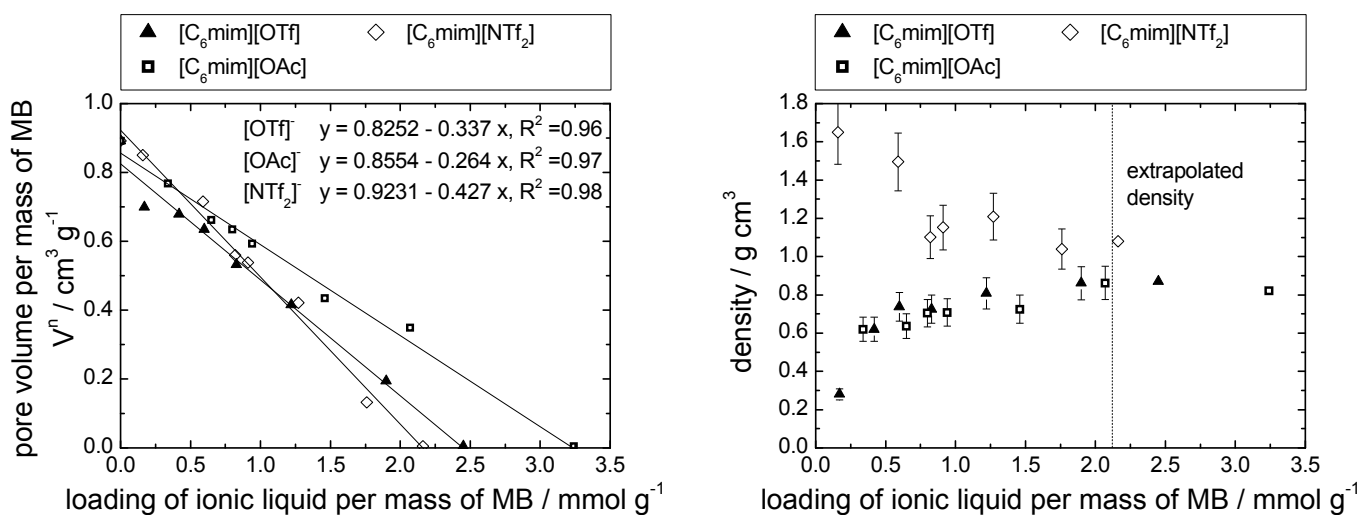

Figure SI 12: Pore volume vs. loading, and density vs. loading of MB modified with incrementally increasing amounts of the ionic liquids investigated.

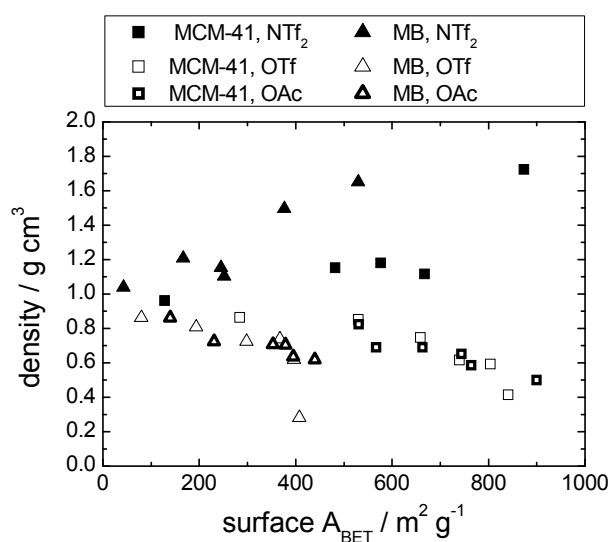

Figure SI 13: Density vs. BET surface of MCM-41 and MB materials.

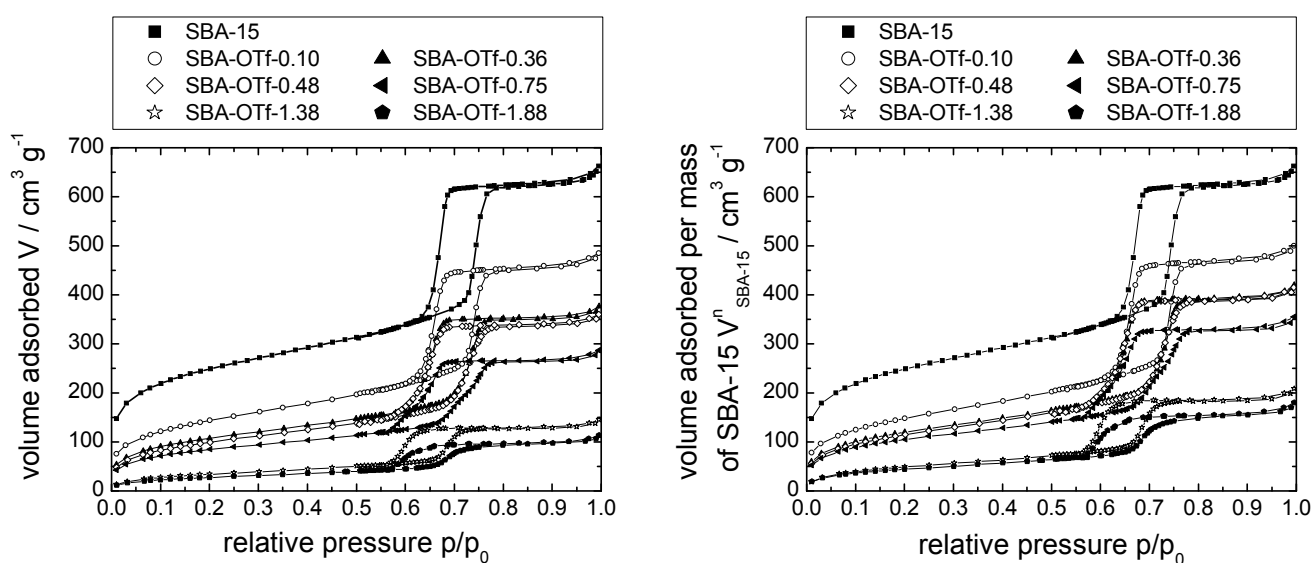

Figure SI 14:  $\text{N}_2$ -sorption isotherms at 77 K of SBA-based materials impregnated with incrementally increasing amounts of  $[\text{C}_6\text{mim}][\text{OTf}]$ ; as volume absorbed per mass of material (left) and as volume absorbed per mass of support (right).



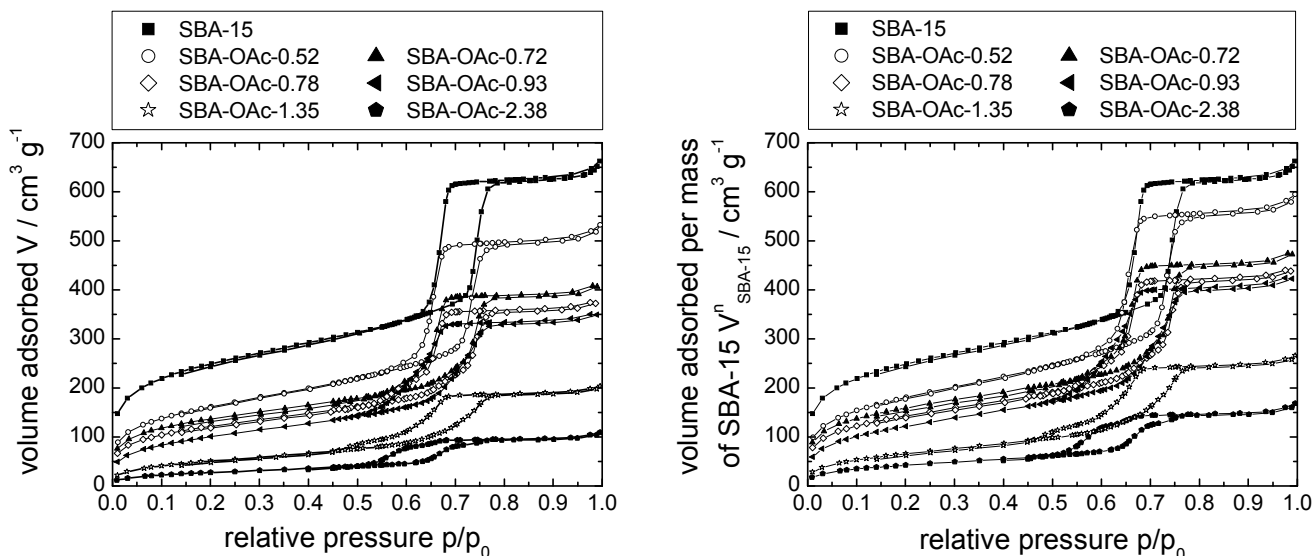

Figure SI 15:  $N_2$ -sorption isotherms at 77 K of SBA-based materials impregnated with incrementally increasing amounts of  $[C_6mim][OAc]$ ; as volume absorbed per mass of material (left) and as volume absorbed per mass of support (right).

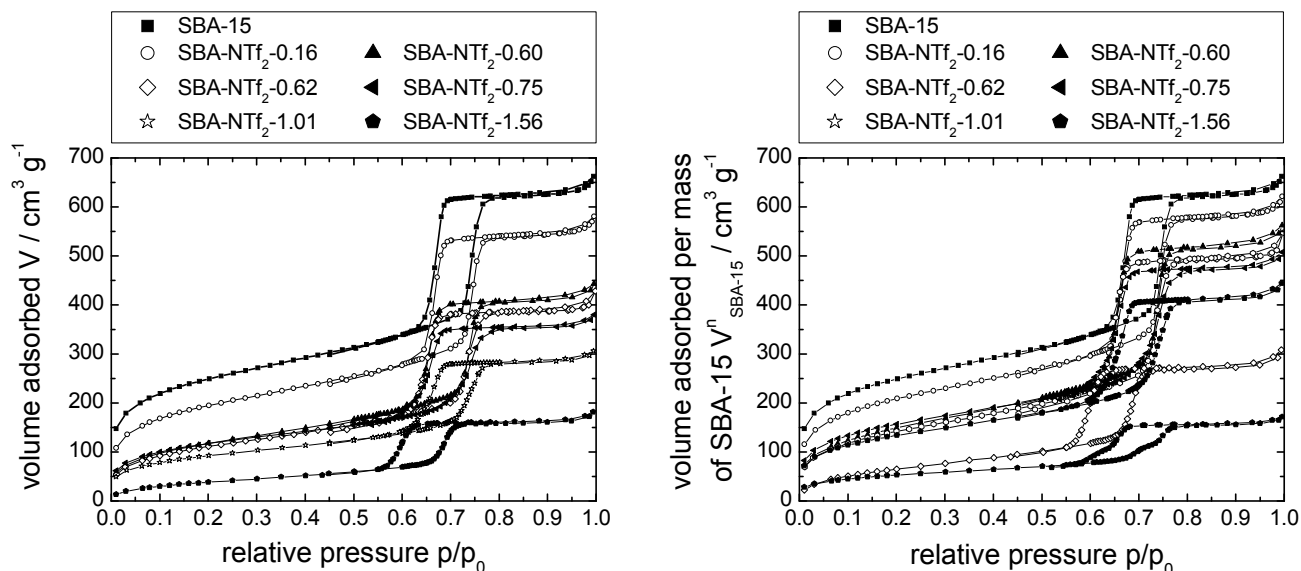

Figure SI 16:  $N_2$ -sorption isotherms at 77 K of SBA-based materials impregnated with incrementally increasing amounts of  $[C_6mim][NTf_2]$ ; as volume absorbed per mass of material (left) and as volume absorbed per mass of support (right).

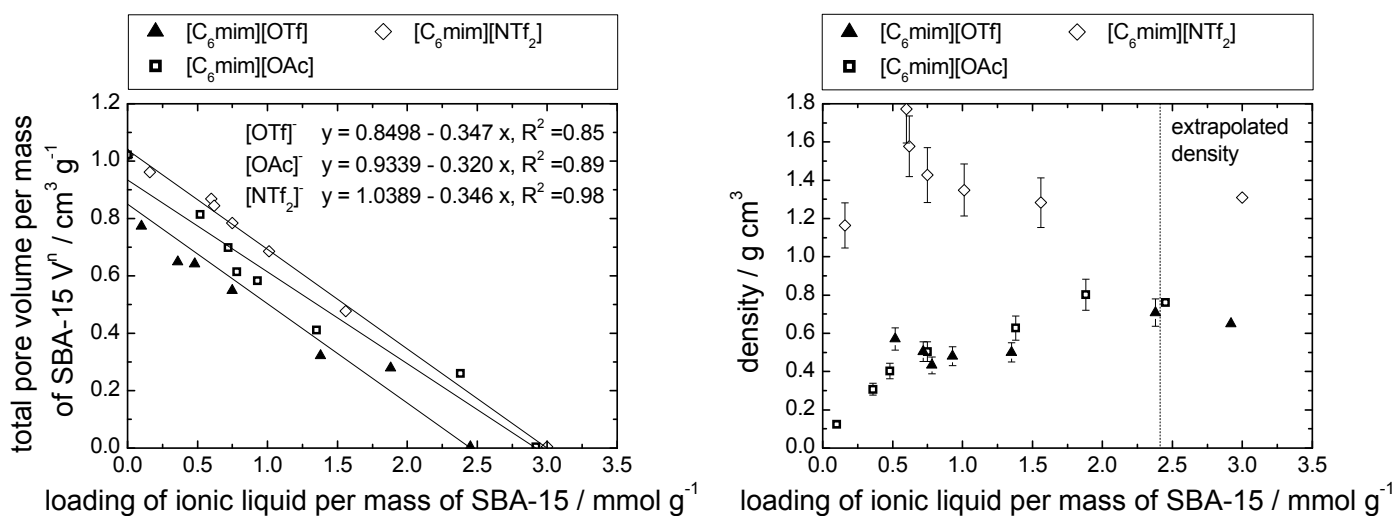

Figure SI 17: Total pore volume vs. loading, and density vs. loading of SBA-15 modified with incrementally increasing amounts of the ionic liquids investigated.

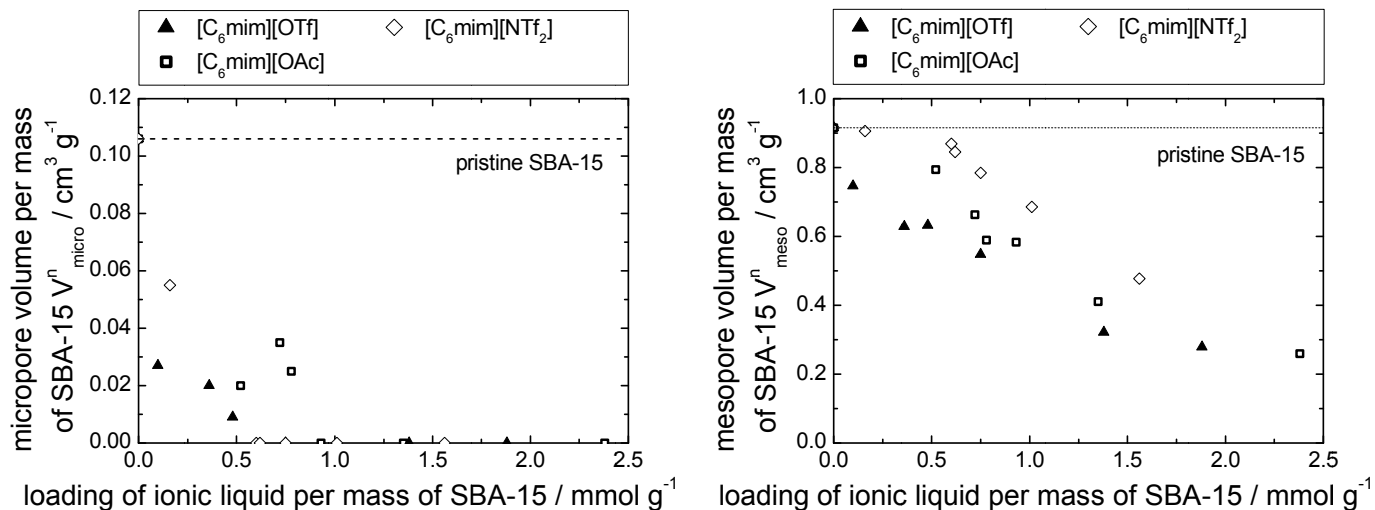

Figure SI 18: Micropore volume vs. loading, and mesopore volume vs. loading of the ionic liquids confined in SBA-15.

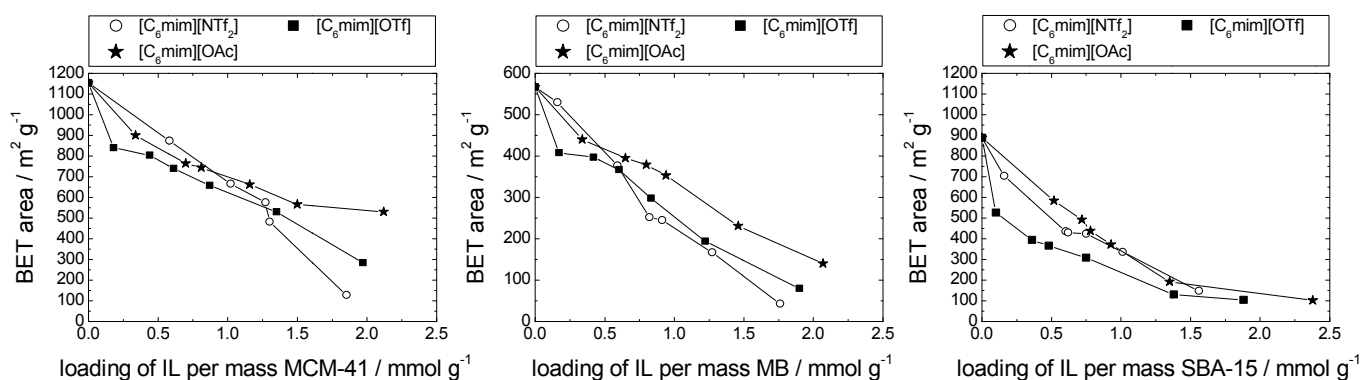

Figure SI 19. BET area vs. loading of  $[C_6mim][NTf_2]$ ,  $[C_6mim][OTf]$  and  $[C_6mim][OAc]$  on MCM-41 (left), MB (middle) and SBA-15 (right).

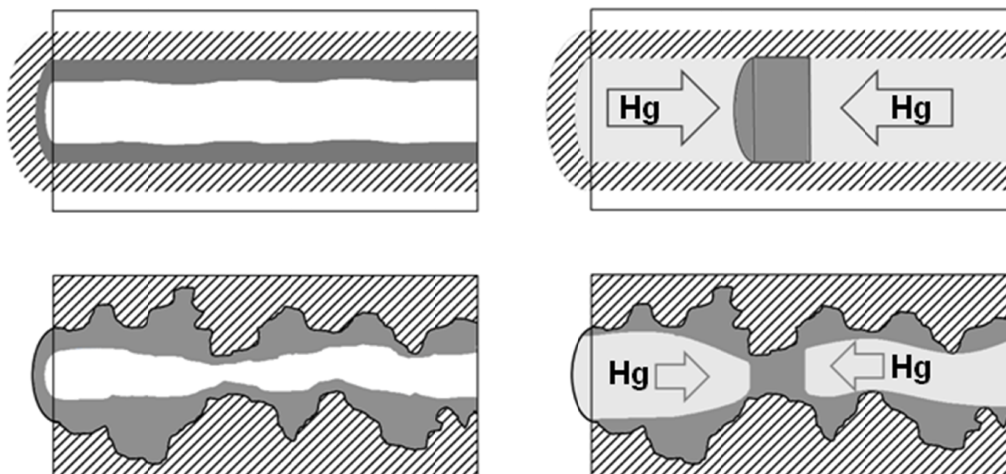

Figure SI 20: Model for the behavior of mercury in SIL-type materials.

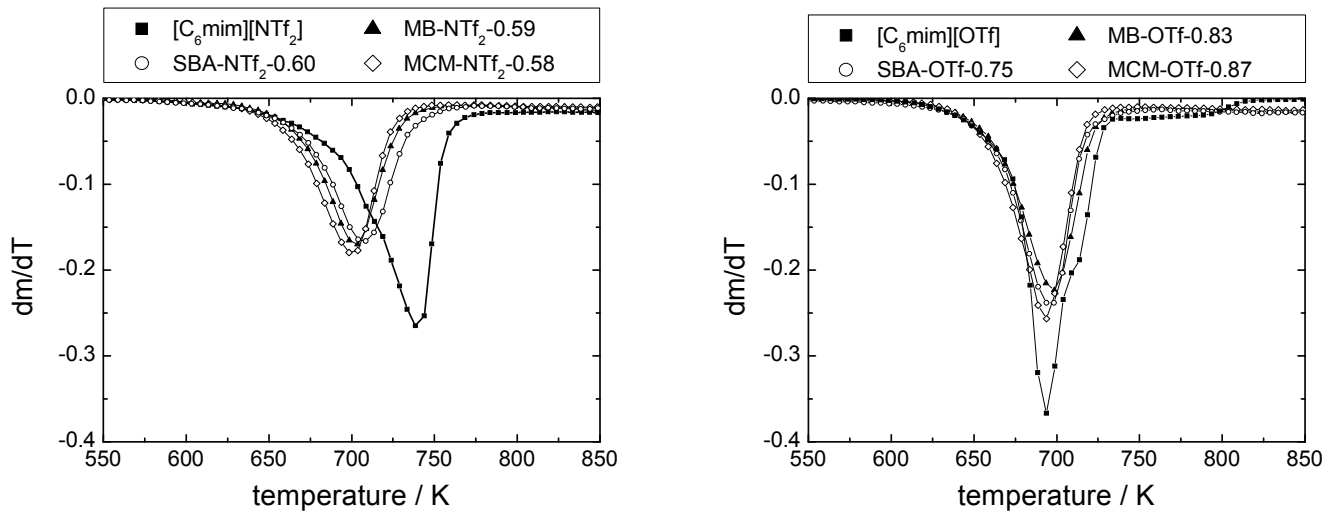

Figure SI 21: DTG signals of [C<sub>6</sub>mim][NTf<sub>2</sub>], SBA-NTf<sub>2</sub>-0.60, MB-NTf<sub>2</sub>-0.59 and MCM-NTf<sub>2</sub>-0.58 (left) and DTG signals of [C<sub>6</sub>mim][OTf], SBA-OTf-0.75, MB-OTf-0.83 and MCM-OTf-0.87 (right).

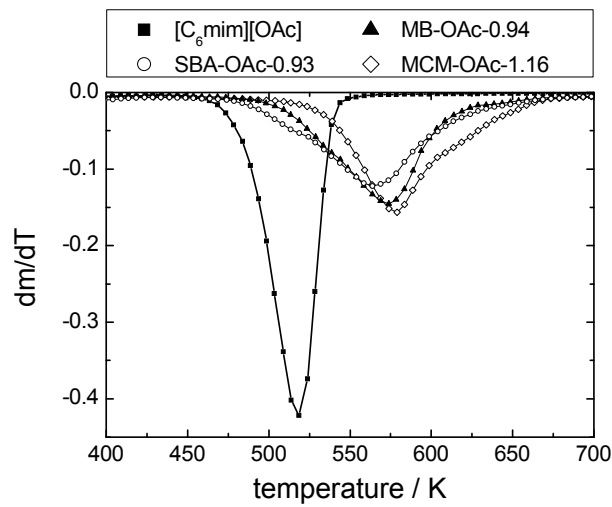

Figure SI 22: DTG signal of [C<sub>6</sub>mim][OAc], SBA-OAc-0.93, MB-OAc-0.94 and MCM-OAc-1.16.

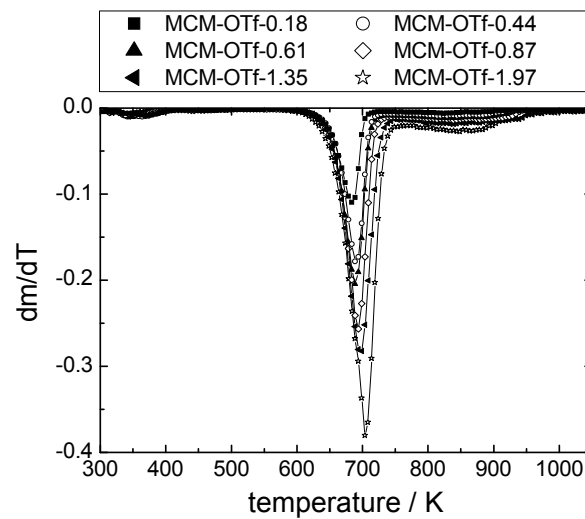

Figure SI 23: DTG of increasing loads of [C<sub>6</sub>mim][OTf] on MCM-41.

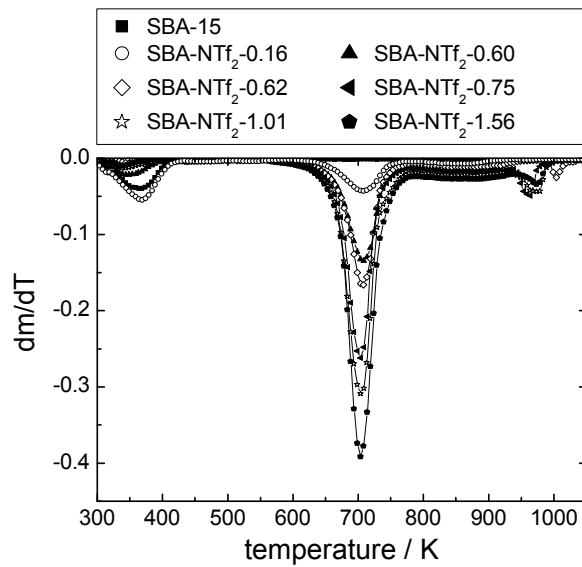

Figure SI 24: DTG of increasing ionic liquid loads of  $[\text{C}_6\text{mim}][\text{NTf}_2]$  on SBA-15.

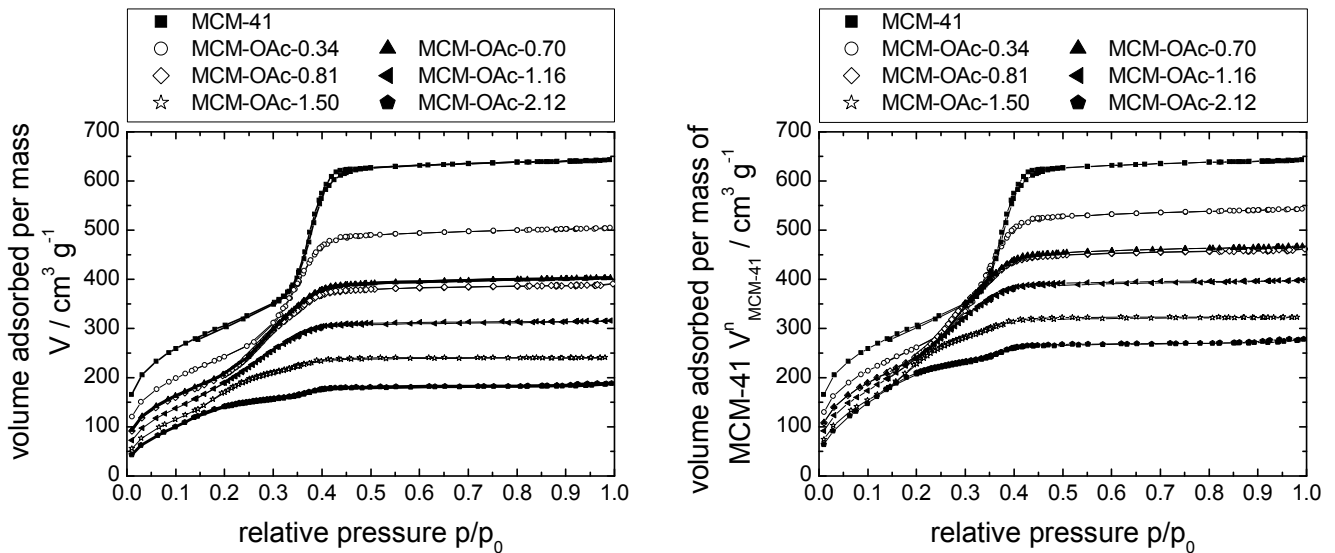

Figure SI 25: Display of all data points measured of Figure 2.  $\text{N}_2$ -sorption isotherms at 77 K of MCM-41-based materials impregnated with incrementally increasing amounts of  $[\text{C}_6\text{mim}][\text{OAc}]$ , as volume adsorbed per mass of material (left) and as volume adsorbed per mass of support (right).

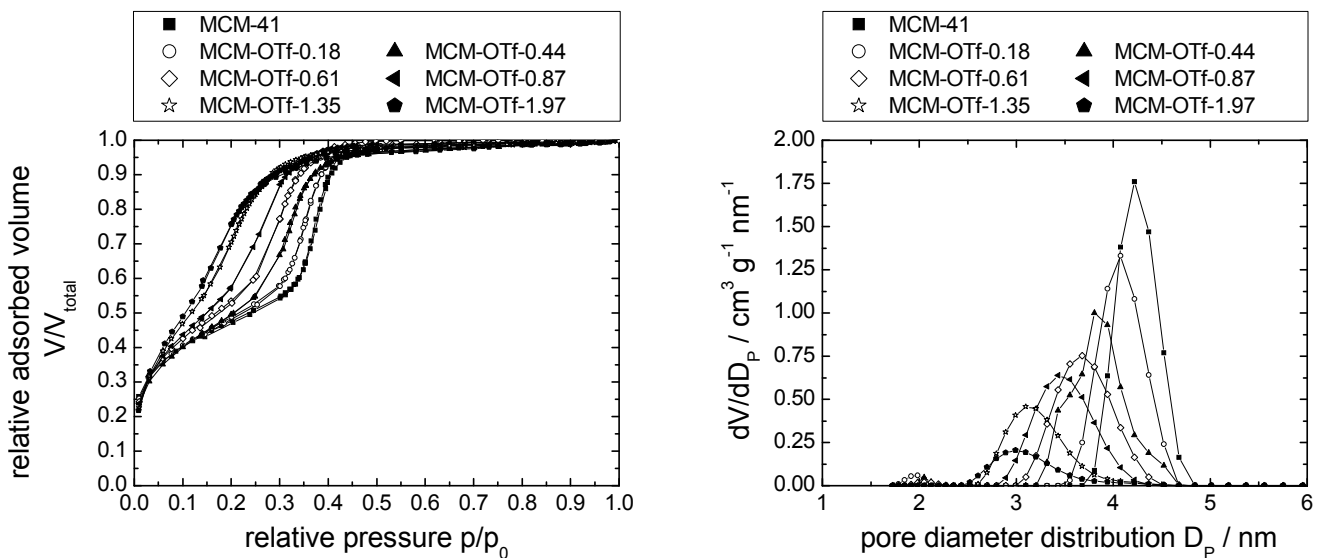

Figure SI 26: Display of all data points measured of Figure 5.  $\text{N}_2$ -sorption isotherms normalised to the mass of support at 77 K (left) and pore diameter distribution (right) of MCM-41 modified with incrementally increasing amounts of  $[\text{C}_6\text{mim}][\text{OTf}]$ .

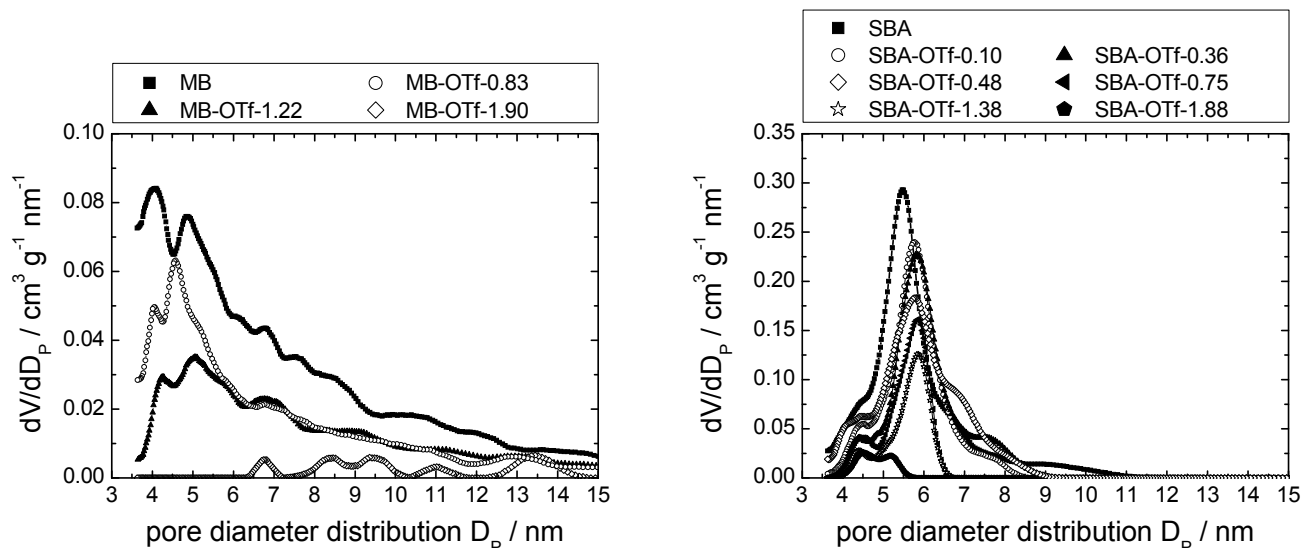

Figure SI 27: Display of all data points measured of Figure 15: Pore diameter distribution profiles determined from Hg-intrusion of MB (left) and SBA-15 (right) with increasing loads of  $[C_6mim][OTf]$ .

Table SI 1: Characterisation of the pristine MCM-41, and of MCM-41 modified with  $[C_6mim][OTf]$ ,  $[C_6mim][NTf_2]$ , or  $[C_6mim][OAc]$ .

| Sample                     | $n_{IL} / \text{mmol g}^{-1}$ | $V_{\text{meso}} / \text{cm}^3 \text{g}^{-1}$ | $V_{\text{meso}}^n / \text{cm}^3 \text{g}^{-1}$ | $A_{\text{BET}} / \text{m}^2 \text{g}^{-1}$ | $C_{\text{BET}}$ | $\rho / \text{g cm}^{-3}$ | $\alpha$ |
|----------------------------|-------------------------------|-----------------------------------------------|-------------------------------------------------|---------------------------------------------|------------------|---------------------------|----------|
| MCM-41                     | 0.00                          | 1.00                                          | 1.00                                            | 1155                                        | 93               | n. a.                     | 0.00     |
| MCM-NTf <sub>2</sub> -0.58 | 0.58                          | 0.67                                          | 0.84                                            | 874                                         | 48               | 1.7                       | 0.15     |
| MCM-NTf <sub>2</sub> -1.02 | 1.02                          | 0.40                                          | 0.59                                            | 667                                         | 39               | 1.1                       | 0.41     |
| MCM-NTf <sub>2</sub> -1.27 | 1.27                          | 0.33                                          | 0.51                                            | 576                                         | 13               | 1.2                       | 0.48     |
| MCM-NTf <sub>2</sub> -1.30 | 1.30                          | 0.31                                          | 0.49                                            | 482                                         | 30               | 1.2                       | 0.51     |
| MCM-NTf <sub>2</sub> -1.85 | 1.85                          | 0.08                                          | 0.14                                            | 128                                         | 17               | 1.0                       | 0.86     |
| MCM-OTf-0.18               | 0.18                          | 0.81                                          | 0.86                                            | 841                                         | 73               | 0.4                       | 0.18     |
| MCM-OTf-0.44               | 0.44                          | 0.67                                          | 0.76                                            | 804                                         | 51               | 0.6                       | 0.33     |
| MCM-OTf-0.61               | 0.61                          | 0.57                                          | 0.68                                            | 740                                         | 46               | 0.6                       | 0.43     |
| MCM-OTf-0.87               | 0.87                          | 0.49                                          | 0.63                                            | 659                                         | 33               | 0.7                       | 0.51     |
| MCM-OTf-1.35               | 1.35                          | 0.35                                          | 0.49                                            | 530                                         | 10               | 0.9                       | 0.65     |
| MCM-OTf-1.97               | 1.97                          | 0.17                                          | 0.27                                            | 284                                         | 13               | 0.9                       | 0.83     |
| MCM-OAc-0.34               | 0.34                          | 0.78                                          | 0.84                                            | 900                                         | 60               | 0.5                       | 0.22     |
| MCM-OAc-0.70               | 0.70                          | 0.62                                          | 0.72                                            | 764                                         | 41               | 0.6                       | 0.37     |
| MCM-OAc-0.81               | 0.81                          | 0.60                                          | 0.71                                            | 744                                         | 29               | 0.7                       | 0.39     |
| MCM-OAc-1.16               | 1.16                          | 0.49                                          | 0.62                                            | 663                                         | 41               | 0.7                       | 0.51     |
| MCM-OAc-1.50               | 1.50                          | 0.38                                          | 0.50                                            | 567                                         | 13               | 0.7                       | 0.62     |
| MCM-OAc-2.12               | 2.12                          | 0.28                                          | 0.41                                            | 531                                         | 20               | 0.8                       | 0.72     |

Note:  $n_{IL}$ : mmol ionic liquid per gram support,  $V_{\text{meso}}$ : mesopore volume, per gram material,  $V_{\text{meso}}^n$ : mesopore volume, normalised per gram support,  $A_{\text{BET}}$ : specific surface area,  $C_{\text{BET}}$ : BET constant,  $\rho$ : density of IL at 77 K,  $\alpha$ : pore filling degree, n. a. not applicable

Table SI 2: Characterisation of the pristine silica gel (MB), and of MB modified with [C<sub>6</sub>mim][NTf<sub>2</sub>], [C<sub>6</sub>mim][OTf] or [C<sub>6</sub>mim][OAc].

| Sample                    | $n_{\text{IL}} / \text{mmol g}^{-1}$ | $V_{\text{meso}} / \text{cm}^3 \text{g}^{-1}$ | $V_{\text{meso}}^{\text{n}} / \text{cm}^3 \text{g}^{-1}$ | $A_{\text{BET}} / \text{m}^2 \text{g}^{-1}$ | $C_{\text{BET}}$ | $\rho / \text{g cm}^{-3}$ | $\alpha$ |
|---------------------------|--------------------------------------|-----------------------------------------------|----------------------------------------------------------|---------------------------------------------|------------------|---------------------------|----------|
| MB                        | 0.00                                 | 0.89                                          | 0.89                                                     | 567                                         | 86               | n. a.                     | 0.00     |
| MB-NTf <sub>2</sub> -0.16 | 0.16                                 | 0.79                                          | 0.85                                                     | 530                                         | 97               | 1.7                       | 0.05     |
| MB-NTf <sub>2</sub> -0.59 | 0.59                                 | 0.57                                          | 0.72                                                     | 377                                         | 35               | 1.5                       | 0.20     |
| MB-NTf <sub>2</sub> -0.82 | 0.82                                 | 0.41                                          | 0.56                                                     | 252                                         | 29               | 1.1                       | 0.37     |
| MB-NTf <sub>2</sub> -0.91 | 0.91                                 | 0.38                                          | 0.54                                                     | 245                                         | 43               | 1.2                       | 0.40     |
| MB-NTf <sub>2</sub> -1.27 | 1.27                                 | 0.27                                          | 0.42                                                     | 167                                         | 28               | 1.2                       | 0.53     |
| MB-NTf <sub>2</sub> -1.76 | 1.76                                 | 0.07                                          | 0.13                                                     | 43                                          | 26               | 1.0                       | 0.85     |
| MB-OTf-0.17               | 0.17                                 | 0.66                                          | 0.70                                                     | 408                                         | 53               | 0.3                       | 0.22     |
| MB-OTf-0.42               | 0.42                                 | 0.60                                          | 0.68                                                     | 397                                         | 34               | 0.6                       | 0.24     |
| MB-OTf-0.60               | 0.60                                 | 0.53                                          | 0.63                                                     | 367                                         | 29               | 0.7                       | 0.29     |
| MB-OTf-0.83               | 0.83                                 | 0.42                                          | 0.53                                                     | 298                                         | 27               | 0.7                       | 0.40     |
| MB-OTf-1.22               | 1.22                                 | 0.30                                          | 0.42                                                     | 194                                         | 28               | 0.8                       | 0.53     |
| MB-OTf-1.90               | 1.90                                 | 0.12                                          | 0.19                                                     | 80                                          | 34               | 0.9                       | 0.78     |
| MB-OAc-0.34               | 0.34                                 | 0.71                                          | 0.77                                                     | 440                                         | 51               | 0.6                       | 0.14     |
| MB-OAc-0.65               | 0.65                                 | 0.58                                          | 0.66                                                     | 395                                         | 32               | 0.6                       | 0.26     |
| MB-OAc-0.80               | 0.80                                 | 0.54                                          | 0.63                                                     | 379                                         | 29               | 0.7                       | 0.29     |
| MB-OAc-0.94               | 0.94                                 | 0.49                                          | 0.59                                                     | 353                                         | 26               | 0.7                       | 0.34     |
| MB-OAc-1.46               | 1.46                                 | 0.33                                          | 0.44                                                     | 231                                         | 25               | 0.7                       | 0.51     |
| MB-OAc-2.07               | 2.07                                 | 0.24                                          | 0.35                                                     | 140                                         | 26               | 0.9                       | 0.61     |

Note:  $n_{\text{IL}}$ : mmol ionic liquid per gram support,  $V_{\text{meso}}$ : mesopore volume, per gram material,  $V_{\text{meso}}^{\text{n}}$ : mesopore volume, normalised per gram support,  $A_{\text{BET}}$ : specific surface area,  $C_{\text{BET}}$ : BET constant,  $\rho$ : density of IL at 77 K,  $\alpha$ : pore filling degree, n. a. not applicable

Table SI 3: Characterisation of the pristine SBA-15, and of SBA-15 modified with [C<sub>6</sub>mim][NTf<sub>2</sub>], [C<sub>6</sub>mim][OTf] or [C<sub>6</sub>mim][OAc].

| Sample                     | $n_{IL} / \text{mmol g}^{-1}$ | $V_{\text{micro}} / \text{cm}^3 \text{g}^{-1}$ | $V_{\text{micro}}^n / \text{cm}^3 \text{g}^{-1}$ | $V_{\text{meso}} / \text{cm}^3 \text{g}^{-1}$ | $V_{\text{meso}}^n / \text{cm}^3 \text{g}^{-1}$ | $A_{\text{micro}} / \text{m}^2 \text{g}^{-1}$ | $A_{\text{meso}} / \text{m}^2 \text{g}^{-1}$ | $A_{\text{BET}} / \text{m}^2 \text{g}^{-1}$ | $C_{\text{BET}}$ | $\rho / \text{g cm}^{-3}$ | $\alpha$ |
|----------------------------|-------------------------------|------------------------------------------------|--------------------------------------------------|-----------------------------------------------|-------------------------------------------------|-----------------------------------------------|----------------------------------------------|---------------------------------------------|------------------|---------------------------|----------|
| SBA-15                     | 0.00                          | 0.11                                           | 0.11                                             | 0.92                                          | 0.92                                            | 252                                           | 636                                          | 888                                         | 234              | n. a.                     | 0.00     |
| SBA-NTf <sub>2</sub> -0.16 | 0.16                          | 0.05                                           | 0.05                                             | 0.85                                          | 0.91                                            | 135                                           | 569                                          | 704                                         | 129              | 1.2                       | 0.06     |
| SBA-NTf <sub>2</sub> -0.60 | 0.60                          | 0.00                                           | 0.00                                             | 0.69                                          | 0.87                                            | 0                                             | 436                                          | 436                                         | 62               | 1.8                       | 0.15     |
| SBA-NTf <sub>2</sub> -0.62 | 0.62                          | 0.00                                           | 0.00                                             | 0.66                                          | 0.85                                            | 0                                             | 412                                          | 430                                         | 65               | 1.6                       | 0.17     |
| SBA-NTf <sub>2</sub> -0.75 | 0.75                          | 0.00                                           | 0.00                                             | 0.59                                          | 0.78                                            | 0                                             | 425                                          | 425                                         | 102              | 1.4                       | 0.23     |
| SBA-NTf <sub>2</sub> -1.01 | 1.01                          | 0.00                                           | 0.00                                             | 0.47                                          | 0.69                                            | 0                                             | 336                                          | 336                                         | 96               | 1.3                       | 0.33     |
| SBA-NTf <sub>2</sub> -1.56 | 1.56                          | 0.00                                           | 0.00                                             | 0.28                                          | 0.48                                            | 0                                             | 149                                          | 149                                         | 34               | 1.3                       | 0.53     |
| SBA-OTf-0.10               | 0.10                          | 0.03                                           | 0.03                                             | 0.72                                          | 0.75                                            | 30                                            | 496                                          | 526                                         | 83               | 0.1                       | 0.24     |
| SBA-OTf-0.36               | 0.36                          | 0.02                                           | 0.02                                             | 0.57                                          | 0.63                                            | 0                                             | 395                                          | 395                                         | 78               | 0.3                       | 0.36     |
| SBA-OTf-0.48               | 0.48                          | 0.01                                           | 0.01                                             | 0.55                                          | 0.63                                            | 0                                             | 367                                          | 367                                         | 70               | 0.4                       | 0.37     |
| SBA-OTf-0.75               | 0.75                          | 0.00                                           | 0.00                                             | 0.44                                          | 0.55                                            | 0                                             | 309                                          | 309                                         | 86               | 0.5                       | 0.46     |
| SBA-OTf-1.38               | 1.38                          | 0.00                                           | 0.00                                             | 0.22                                          | 0.32                                            | 0                                             | 131                                          | 131                                         | 42               | 0.6                       | 0.68     |
| SBA-OTf-1.88               | 1.88                          | 0.00                                           | 0.00                                             | 0.18                                          | 0.28                                            | 0                                             | 105                                          | 105                                         | 51               | 0.8                       | 0.73     |
| SBA-OAc-0.52               | 0.52                          | 0.02                                           | 0.02                                             | 0.71                                          | 0.79                                            | 56                                            | 529                                          | 585                                         | 104              | 0.6                       | 0.20     |
| SBA-OAc-0.72               | 0.72                          | 0.03                                           | 0.03                                             | 0.57                                          | 0.66                                            | 78                                            | 415                                          | 493                                         | 137              | 0.5                       | 0.32     |
| SBA-OAc-0.78               | 0.78                          | 0.02                                           | 0.02                                             | 0.50                                          | 0.59                                            | 58                                            | 381                                          | 439                                         | 120              | 0.4                       | 0.40     |
| SBA-OAc-0.93               | 0.93                          | 0.00                                           | 0.00                                             | 0.48                                          | 0.58                                            | 0                                             | 372                                          | 372                                         | 66               | 0.5                       | 0.43     |
| SBA-OAc-1.35               | 1.35                          | 0.00                                           | 0.00                                             | 0.32                                          | 0.41                                            | 0                                             | 192                                          | 192                                         | 45               | 0.5                       | 0.60     |
| SBA-OAc-2.38               | 2.38                          | 0.00                                           | 0.00                                             | 0.17                                          | 0.26                                            | 0                                             | 103                                          | 103                                         | 53               | 0.7                       | 0.75     |

Note:  $n_{IL}$ : mmol ionic liquid per gram support,  $V_{\text{micro}}$ ,  $V_{\text{meso}}$ : micro- resp. mesopore volume, per gram material,  $V_{\text{micro}}^n$ ,  $V_{\text{meso}}^n$ : micro- resp. mesopore volume, normalised per gram support,  $A_{\text{micro}}$ ,  $A_{\text{meso}}$ ,  $A_{\text{BET}}$ : micro-, meso and total specific surface area,  $C_{\text{BET}}$ : BET constant,  $\rho$ : density of IL at 77 K,  $\alpha$ : pore filling degree, n. a. not applicable

Table SI 4: Characterisation of the pristine MCM-41 NMR, and of MCM-41 NMR modified with [C<sub>6</sub>mim][NTf<sub>2</sub>].

| Sample                         | $n_{IL} / \text{mmol g}^{-1}$ | $V_{\text{meso}} / \text{cm}^3 \text{g}^{-1}$ | $V_{\text{meso}}^n / \text{cm}^3 \text{g}^{-1}$ | $A_{\text{BET}} / \text{m}^2 \text{g}^{-1}$ | $C_{\text{BET}}$ | $\rho / \text{g cm}^{-3}$ | $\alpha$ |
|--------------------------------|-------------------------------|-----------------------------------------------|-------------------------------------------------|---------------------------------------------|------------------|---------------------------|----------|
| MCM-41_NMR                     | 0.00                          | 1.07                                          | 1.07                                            | 1136                                        | 78               | n. a.                     | 0.00     |
| MCM-NTf <sub>2</sub> -0.23_NMR | 0.23                          | 0.89                                          | 0.99                                            | 1045                                        | 59               | 1.3                       | 0.16     |
| MCM-NTf <sub>2</sub> -0.47_NMR | 0.47                          | 0.75                                          | 0.91                                            | 916                                         | 45               | 1.4                       | 0.30     |
| MCM-NTf <sub>2</sub> -0.78_NMR | 0.78                          | 0.44                                          | 0.59                                            | 803                                         | 16               | 0.7                       | 0.59     |

Note:  $n_{IL}$ : mmol ionic liquid per gram support,  $V_{\text{meso}}$ : mesopore volume, per gram material,  $V_{\text{meso}}^n$ : mesopore volume, normalised per gram support,  $A_{\text{BET}}$ : specific surface area,  $C_{\text{BET}}$ : BET constant,  $\rho$ : density of IL at 77 K,  $\alpha$ : pore filling degree, n. a. not applicable

Table SI 5: Decomposition temperature of the bulk ionic liquids and of the ionic liquids confined in different silicate-based porous supports (MCM-41, MB and SBA-15).

| Sample                                  | temperature /<br>K | sample                    | temperature /<br>K | sample                    | temperature /<br>K |
|-----------------------------------------|--------------------|---------------------------|--------------------|---------------------------|--------------------|
| [C <sub>6</sub> mim][NTf <sub>2</sub> ] | 739                | [C <sub>6</sub> mim][OTf] | 693                | [C <sub>6</sub> mim][OAc] | 519                |
| MCM-NTf <sub>2</sub> -0.58              | 700                | MCM-OTf-0.87              | 693                | MCM-OAc-0.94              | 578                |
| MB-NTf <sub>2</sub> -0.59               | 702                | MB-OTf-0.83               | 697                | MB-OAc-1.16               | 574                |
| SBA-NTf <sub>2</sub> -0.60              | 709                | SBA-OTf-0.75              | 695                | SBA-OAc-0.93              | 564                |

Table SI 6: Decomposition temperature of [C<sub>6</sub>mim][OTf] immobilised on the supports MCM-41, MB and SBA-15 with increasing loads of ionic liquid.

| Sample       | temperature /<br>K | sample      | temperature /<br>K | sample       | temperature /<br>K |
|--------------|--------------------|-------------|--------------------|--------------|--------------------|
| MCM-OTf-0.18 | 684                | MB-OTf-0.17 | 693                | SBA-OTf-0.10 | 698                |
| MCM-OTf-0.44 | 689                | MB-OTf-0.42 | 695                | SBA-OTf-0.36 | 698                |
| MCM-OTf-0.61 | 689                | MB-OTf-0.60 | 697                | SBA-OTf-0.48 | 693                |
| MCM-OTf-0.87 | 693                | MB-OTf-0.83 | 697                | SBA-OTf-0.75 | 695                |
| MCM-OTf-1.35 | 695                | MB-OTf-1.22 | 696                | SBA-OTf-1.38 | 693                |
| MCM-OTf-1.97 | 704                | MB-OTf-1.90 | 707                | SBA-OTf-1.88 | 690                |

Table SI 7: Decomposition temperature of [C<sub>6</sub>mim][NTf<sub>2</sub>] immobilised on the supports MCM-41 and MB with increasing loads of ionic liquid.

| Sample                    | temperature /<br>K | sample                     | temperature /<br>K |
|---------------------------|--------------------|----------------------------|--------------------|
| MB-NTf <sub>2</sub> -0.16 | 695                | SBA-NTf <sub>2</sub> -0.16 | 708                |
| MB-NTf <sub>2</sub> -0.59 | 702                | SBA-NTf <sub>2</sub> -0.60 | 709                |
| MB-NTf <sub>2</sub> -0.82 | 703                | SBA-NTf <sub>2</sub> -0.62 | 706                |
| MB-NTf <sub>2</sub> -0.91 | 704                | SBA-NTf <sub>2</sub> -0.75 | 704                |
| MB-NTf <sub>2</sub> -1.27 | 707                | SBA-NTf <sub>2</sub> -1.01 | 704                |
|                           |                    | SBA-NTf <sub>2</sub> -1.56 | 704                |
